# Supplementary material for: Crystal engineering with a purine rare tautomer: structures and luminescence properties
Source: Royal Society of Chemistry journal article supplement (doi:10.1039/c4ce00611a), 2014-01-01
Supplement: c4ce00611a1.pdf [file c4ce00611a1.pdf]

Supporting Information

**Crystal Engineering with a Purine Rare Tautomer: Structures and Luminescence Properties**

**Shruti Khanna<sup>a</sup> and Sandeep Verma<sup>a,b\*</sup>**

<sup>a</sup>Department of Chemistry, <sup>b</sup>Centre for Environmental Sciences and Engineering

Indian Institute of Technology Kanpur, Kanpur-208016 (UP), India

sverma@iitk.ac.in

**General Experimental Information.**

High resolution (ESI<sup>+</sup> mode) mass spectra were obtained on WATERS HAB 213 machine, Department of Chemistry, IIT Kanpur. Absorbance spectra were recorded on Varian Cary 100 BIO with 10 mm quartz cell at 25±0.1°C. Emission spectra were recorded on Varian Luminescence Cary eclipsed with 10 mm quartz cell at 25±0.1°C. Photoluminescence spectra were recorded on Horiba FluoroLog 3 with 10 mm quartz cell at 25±0.1°C.

# HRMS of Complex 1:

Electrospray ionisation-MS

WATERS-Q-ToF Premier-HAB213

04:27:4806-Sep-2012

SVSK-Cd(PF6)2+ 10 (0.255) AM (Cen,4, 70.00, Ar,8500.0,556.28,20.00,LS 10); Sm (SG, 2x5.00); Sb (10,1.00 ); Cm (7:21-151:158) 1: TOF MS ES+ 4.40e5

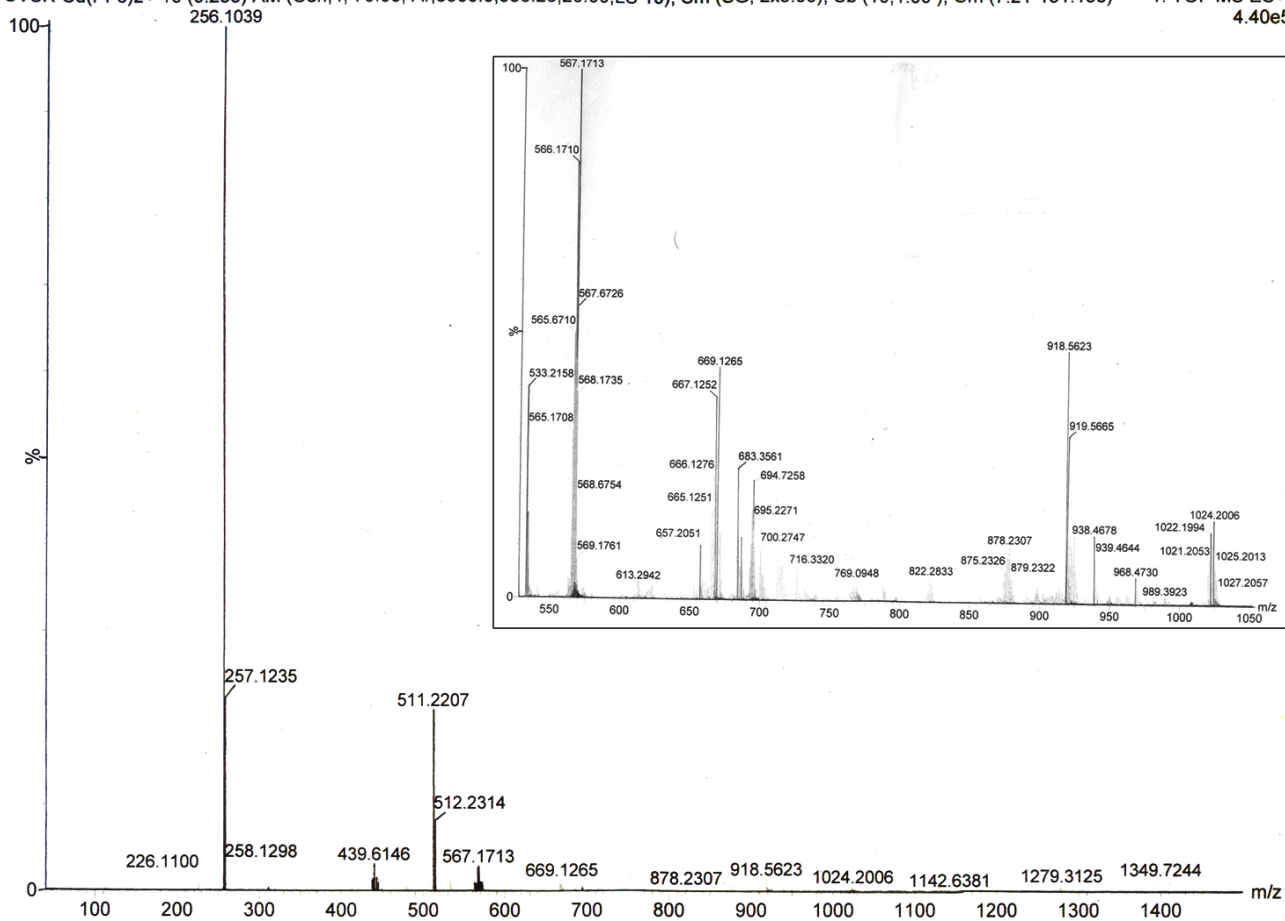

# HRMS of complex 2:

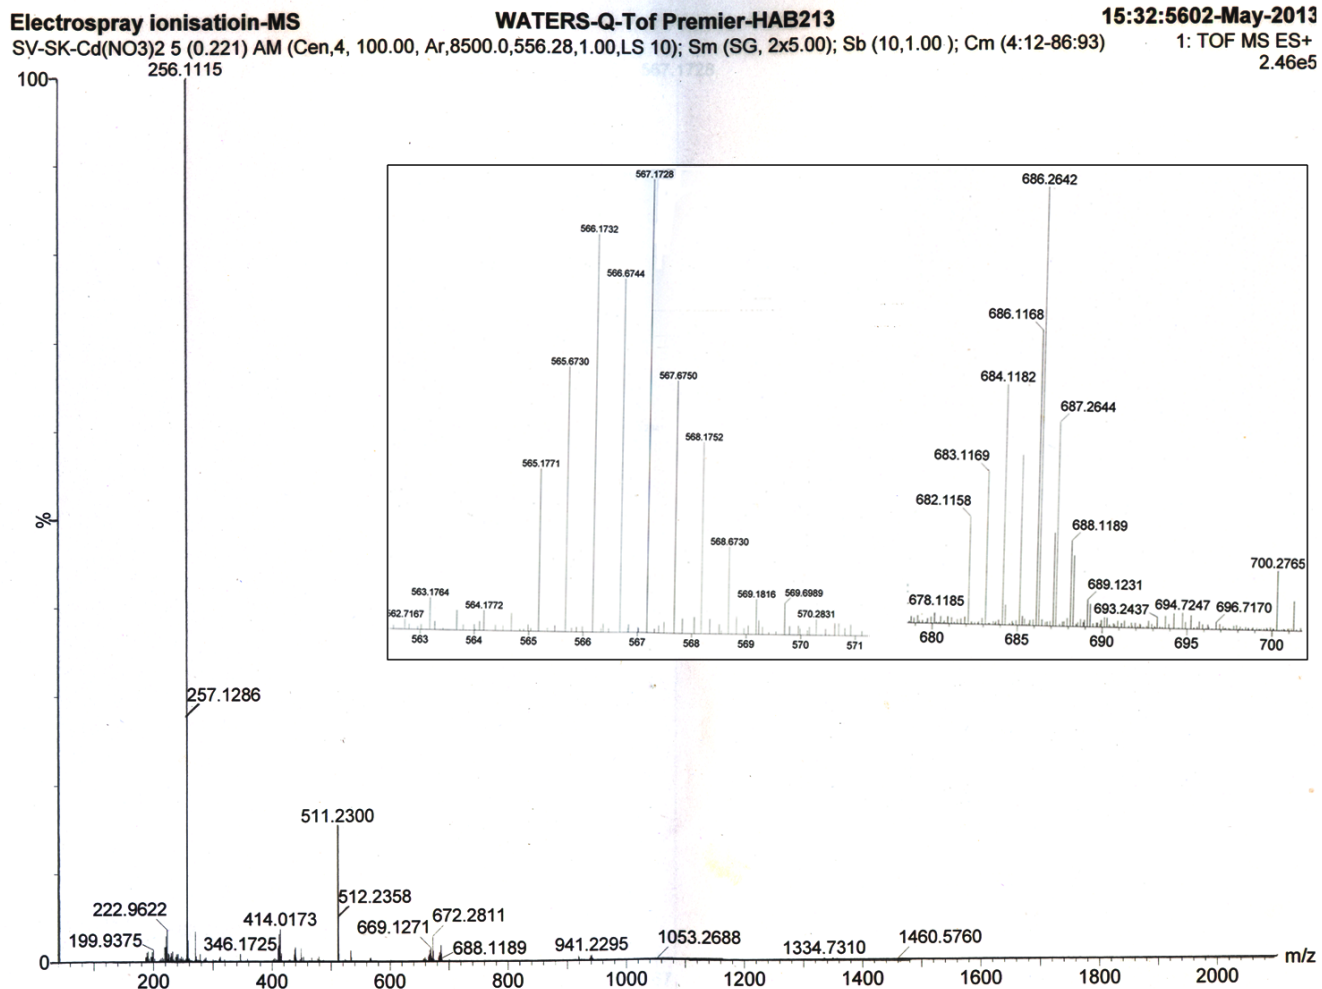

# HRMS of complex 3:

Electrospray ionisation-MS

WATERS-Q-ToF Premier-HAB213

12:21:3405-Sep-2012

SVSK-CdCl<sub>2</sub> 8 (0.211) AM (Cen,4, 100.00, Ar,8500.0,556.28,1.00,LS 10); Sm (SG, 2x5.00); Sb (10,1.00); Cm (6:18-105:127)

1: TOF MS ES+

2.69e5

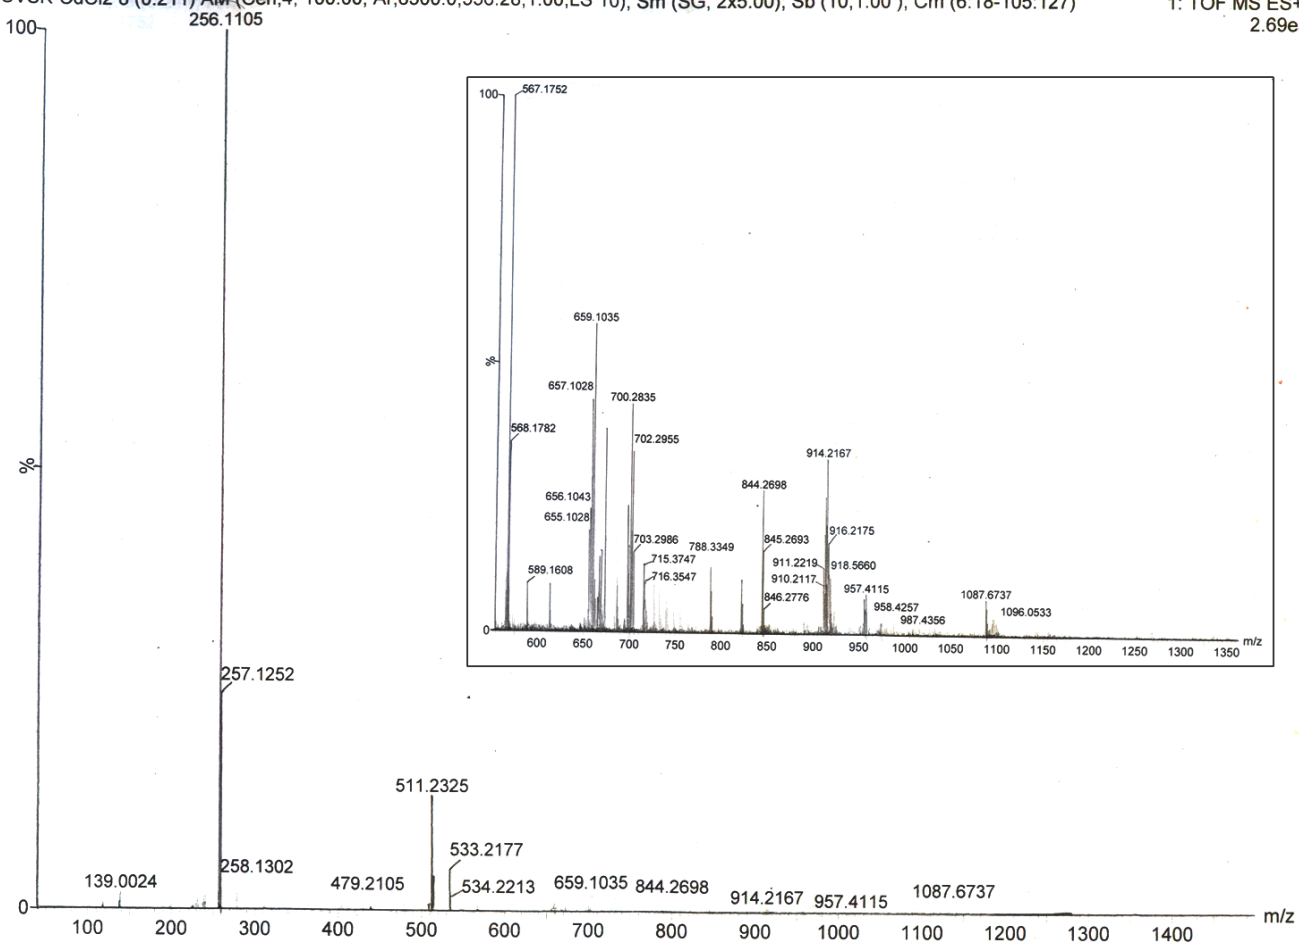

# HRMS of complex 4:

Electrospray ionisation-MS      WATERS-Q-ToF Premier-HAB213      16:25:3902-May-2013  
SV-SK-Cd(OAc)<sub>2</sub>+ 14 (0.360) AM (Cen,4, 100.00, Ar,8500.0,556.28,1.00,LS 10); Sm (SG, 2x5.00); Sb (10,1.00 ); Cm (14:20-142:152) 1: TOF MS ES+ 1.37e5

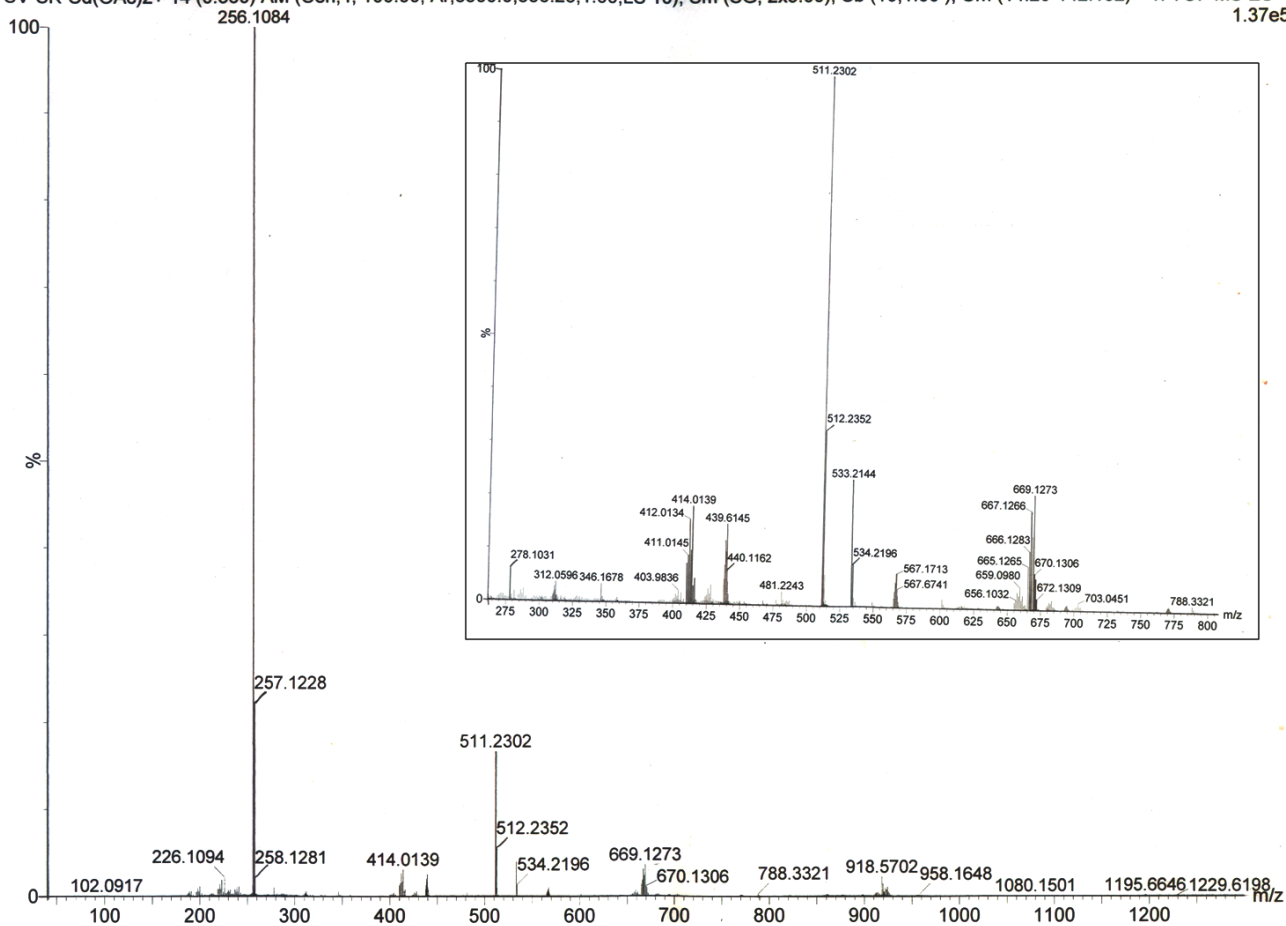

**Table S1:** Selected Bond Lengths (Å) and Bond Angles (°) for complexes **1-4****Complex 1**

| Bond Lengths (Å) |        |
|------------------|--------|
| Cd–N(7A)         | 2.21   |
| Cd–N(7B)         | 2.24   |
| Cd–N(7C)         | 2.19   |
| Cd–N(7D)         | 2.19   |
| Bond Angles (°)  |        |
| N7(A)–Cd–N7(B)   | 107.52 |
| N7(A)–Cd–N7(D)   | 103.64 |
| N7(C)–Cd–N7(D)   | 111.77 |
| N7(C)–Cd–N7(B)   | 110.68 |

**Complex 2**

| Bond Lengths (Å) |        |
|------------------|--------|
| Cd–N(7)          | 2.412  |
| Cd–N(7')         | 2.409  |
| Cd–O(1W)         | 2.252  |
| Bond Angles (°)  |        |
| N(7)–Cd–N(7')    | 92.836 |

### Complex 3

| Bond Lengths (Å)                     |        |
|--------------------------------------|--------|
| Cd–N(7)                              | 2.378  |
| Cd–N(7')                             | 2.389  |
| Cd–Cl <sub>t</sub>                   | 2.530  |
| Cd–Cl <sub>b</sub>                   | 2.356  |
| Cd–Cl <sub>b'</sub>                  | 2.455  |
| Bond Angles (°)                      |        |
| Cd1–Cl <sub>b</sub> –Cd2             | 74.23  |
| Cl <sub>b</sub> –Cd–Cl <sub>b'</sub> | 105.76 |
| N7–Cd–N7'                            | 177.92 |

### Complex 4

| Bond Lengths (Å) |       |
|------------------|-------|
| Cd–N(7)          | 2.403 |
| Cd–N(7')         | 2.387 |
| Cd–O(1W)         | 2.240 |
| Cd–O(2)          | 2.330 |
| Cd–O(3)          | 2.585 |
| Cd–O(4)          | 2.328 |
| Cd–O(5)          | 2.458 |

| Bond Angles (°) |        |
|-----------------|--------|
| O2–Cd–O3        | 52.89  |
| O4–Cd–O5        | 54.45  |
| N7–Cd–N7'       | 178.38 |

**Table S2:** Hydrogen bonding Table for complexes **1-4**<sup>#</sup>

| D-H...A             | Symmetry of A | D-H  | H...A | D-A   | ∠D—H...A |
|---------------------|---------------|------|-------|-------|----------|
| <b>Complex 1</b>    |               |      |       |       |          |
| N(1A)—H(1A)...N(3B) | -1+x,y,-1+z   | 0.86 | 2.11  | 2.891 | 150      |
| N(1B)—H(1B)...N(3C) | x,y,1+z       | 0.86 | 2.06  | 2.860 | 155      |
| N(1C)—H(1C)...N(3D) | x,-1+y,-1+z   | 0.86 | 2.12  | 2.907 | 153      |
| N(1D)—H(1D)...N(3A) | 1+x,1+y,1+z   | 0.86 | 2.05  | 2.842 | 152      |
| <b>Complex 2</b>    |               |      |       |       |          |
| N(1)—H(1)...O(5)    | x,y,-1+z      | 0.86 | 2.33  | 2.987 | 134      |
| N(1')—H(1')...O(6)  | 1+x,y,z       | 0.86 | 1.95  | 2.753 | 155      |
| O(1W)—H(1W)...N(6') |               | 0.83 | 1.89  | 2.715 | 170      |
| O(1W)—H(2W)...N(6)  | 2-x,-y,-z     | 0.83 | 1.92  | 2.736 | 168      |
| O(6)—H(6)...O(3)    |               | 0.82 | 1.94  | 2.757 | 177      |
| <b>Complex 3</b>    |               |      |       |       |          |
| N(1)—H(1)...Cl(2)   | 1-x,1-y,1-z   | 0.86 | 2.40  | 3.220 | 159      |
| C(2)—H(2)...N(3')   | 1+x,1+y,z     | 0.93 | 2.59  | 3.490 | 164      |
| <b>Complex 4</b>    |               |      |       |       |          |
| N(1)—H(1)...O(5)    | 1-x,1-y,1-z   | 0.86 | 1.97  | 2.753 | 151      |
| N(1')—H(1')...O(2)  | 2-x,2-y,1-z   | 0.86 | 2.00  | 2.764 | 148      |
| C(2)—H(2)...N(3)    | -x,1-y,1-z    | 0.93 | 2.50  | 3.287 | 143      |

<sup>#</sup> Where D is donor and A is acceptor, the bond lengths are in Å and angles are in deg.



## PXRD Patterns

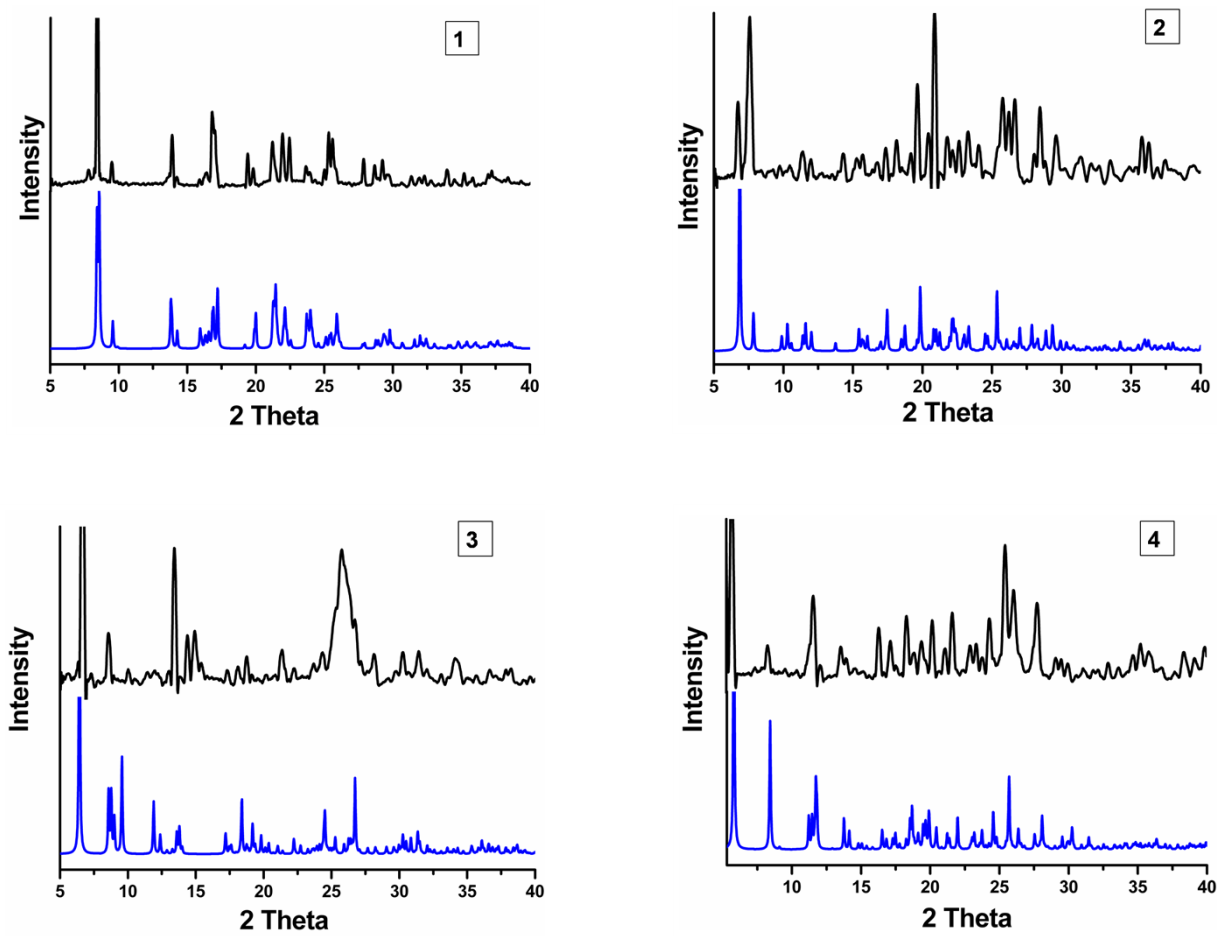

**Figure S1.** The simulated (blue) and experimental (black) PXRD patterns for four complexes **1-4**.

## TGA Curve

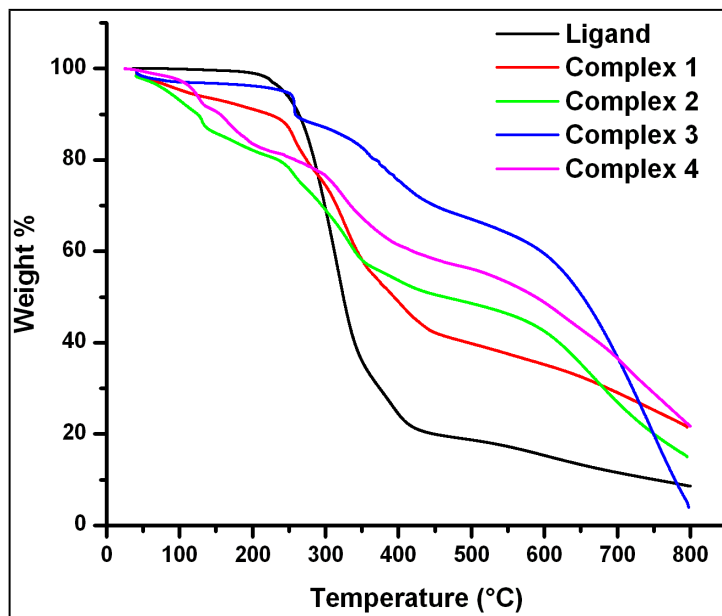

**Figure S2.** The TGA curves for ligand, **L** and complexes 1-4.

## UV-Visible Spectrum

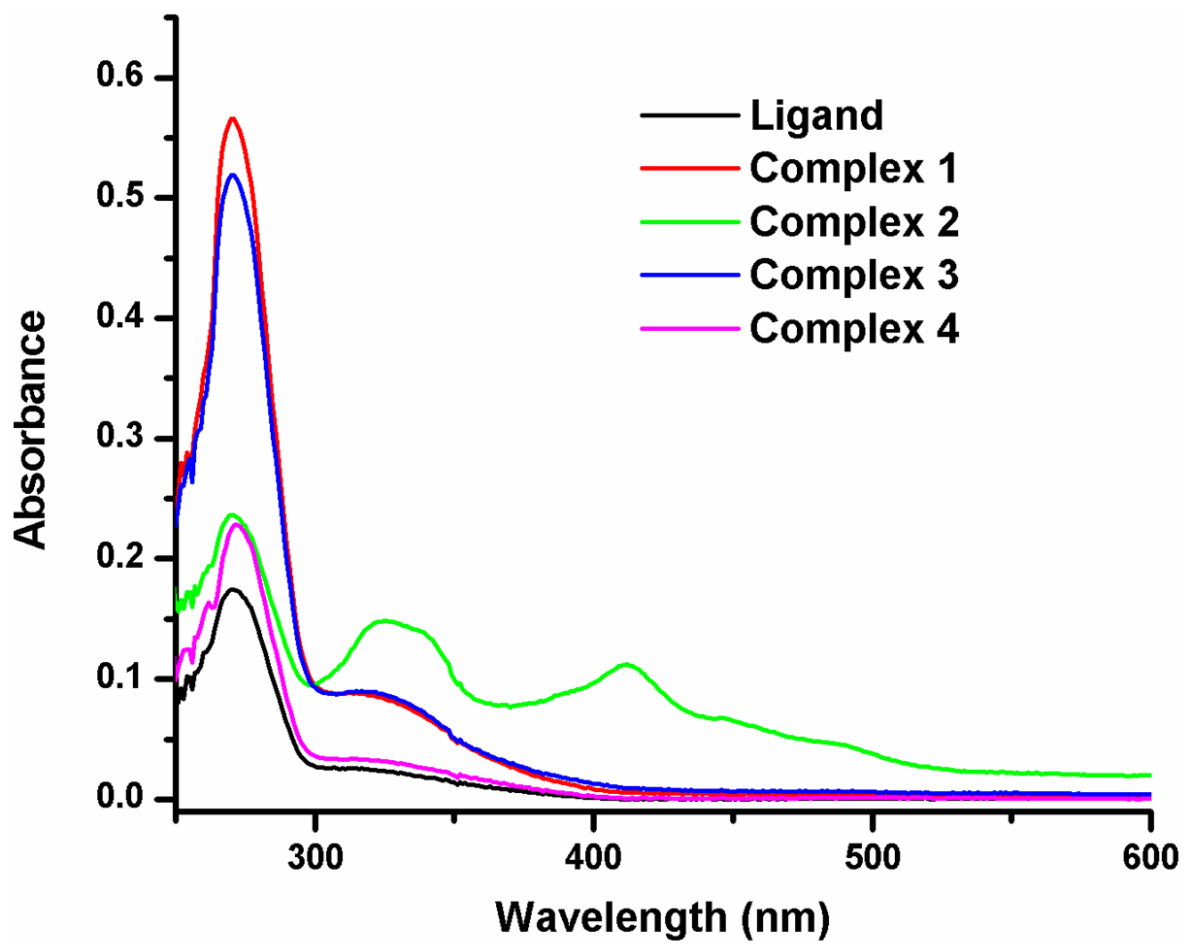

**Figure S3:** UV-Vis spectra of ligand, L and cadmium complexes, 1-4 were recorded in DMF at  $10^{-5}$  M concentration.

## Emission Spectra

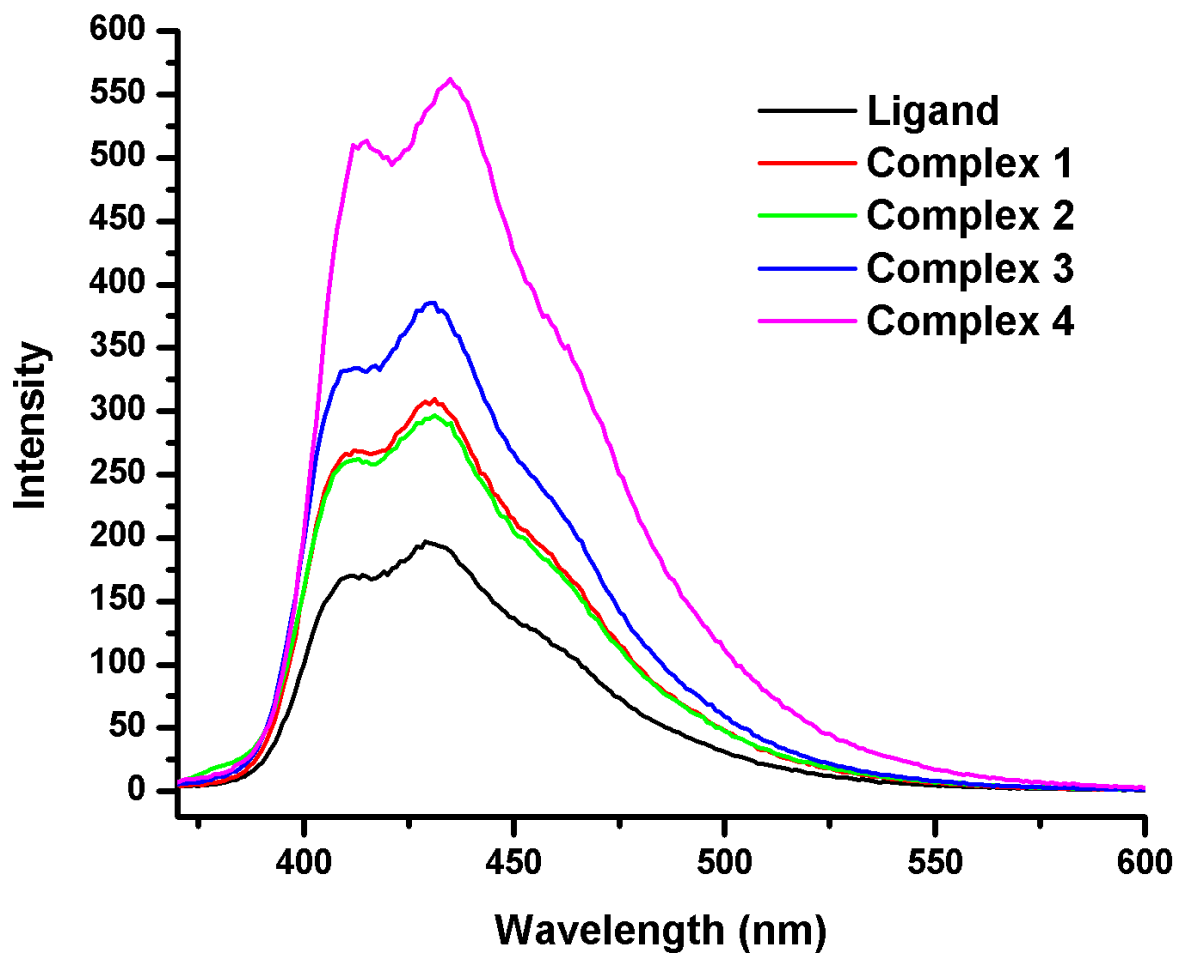

Figure S4. Emission spectra illustrating fluorescent intensities of ligand, L and cadmium complexes, 1-4 recorded in DMF at  $10^{-5}$  M concentration.
